# Supplementary material for: Phosphorescent mechanism for single-dopant white OLED of FPt: electronic structure and electron exchange-induced energy transfer
Source: Royal Society of Chemistry journal article supplement (doi:10.1039/c3tc30692e), 2013-01-01
Supplement: c3tc30692e.pdf [file c3tc30692e.pdf]

## **Electronic Supplementary Information**

**for**

**Phosphorescent mechanism for single-dopant white  
OLED of FPt: electronic structure and electron  
exchange-induced energy transfer**

*Juan Han, Lin Shen, Xuebo Chen\*, Weihai Fang\**

## Section 1, Computational details

### 1.1 Selection of active space

To perform multiconfigurational calculations using CASSCF methods, a set of active orbitals must be selected, and the success of the methods depends on the choice of this set (V. Veryazov, P. Malmqvist, B O. Roos *Int. J. Quantum. Chem.* 2011, *111*, 3329–3338). The numerous test calculations were carried out before optimizations were performed in this work. The compromising must be made between accuracy and computational cost. As shown in Figure SI-1 in the section of supporting information, the  $d_{x^2-y^2}$  orbital of Pt(II) center is used to form Pt-C  $\sigma$  bond. The electron transition originating from  $d_{x^2-y^2}$  orbital inevitably leads to chemical reaction of Pt-C bond fission, which is not closely related to central issue of the photophysical emission in this work. Therefore,  $d_{x^2-y^2}$  orbital is excluded from active space. Unlike  $d_{yz}$ ,  $d_{xz}$ , and  $d_z^2$  orbitals, the symmetry of  $d_{xy}$  orbital does not match with neighboring ligands of pyridinyl or benzene ring from viewpoints of the orientation of electronic transition (see Figure SI-1). The test calculation with  $d_{xy}$  orbital included in the active space shows that occupation number of  $d_{xy}$  orbital was found to be close to 2.0, which indicates  $d_{xy}$  orbital unlikely makes significant contributions to electron transition. We also calculated the vertical excitation with active space containing  $d_{xy}$  orbital. However, no electronic transition associated with  $d_{xy}$  orbital was found by using 5~16 roots stated average calculations. This indicates that  $d_{xy}$  orbital has little possibility to be involved in FC excitation of FPt. Therefore, only  $d_{yz}$ ,  $d_{xz}$ , and  $d_z^2$  orbitals for Pt(II) center were included in active space while the other two orbitals of  $d_{x^2-y^2}$  and  $d_{xy}$  were excluded from active space for saved computational cost.

As shown in Table SI-1 of SI, one  $\pi^*$  orbital of pyridinyl ring with 4 nodes has the lowest orbital energy (1.9 eV at MP4 level of theory) in all virtual orbital and is LUMO orbital. This orbital frequently serve as electron acceptor for metal→ligand (M→L) and intra-ligand (L→L') transitions in most cases of test calculations. As a priority choice, this orbital together with its paired orbital with two nodes localized on the moiety of pyridinyl ring should be included in active space (see Figure SI-2 of SI). One should keep in mind that  $\pi$  orbitals have to appear in active space together with their paired anti-bonding  $\pi^*$  orbital. To further account for the roles of important pyridinyl ligand for electron transition, one more paired  $\pi$  (2 nodes) and  $\pi^*$  (4 nodes) orbital of pyridinyl ring was added to the active space. Similarly, one paired  $\pi$  (2

nodes) and  $\pi^*$  (4 nodes) orbital of benzene ring moiety was chosen in active space to describe the ligand localized excitation on benzene ring. Meanwhile, HOMO and LUMO for acac ligand were also included resulting in total 14e/11o active space. The test calculations of vertical excitation were also carried out by using larger active space 16e/13o. The added orbitals originate from one more paired  $\pi$  (2 nodes) and  $\pi^*$  (4 nodes) orbital of benzene ring. The CPU time of test calculations using 16e/13o active space is 3~4 times longer than that at 14e/11o level of theory. As shown in Table SI-2 of SI, the calculated vertical excitation energies for different transitions at CAS(16,13)/6-31g\*/CASPT2 level are blue shifted in comparison with those of experimental observation. This indicates that the use of large active space where more orbitals are included from the ligand of benzene ring does not obviously improve the accuracy but has computational cost significantly increased. As illustrated in Table SI-3 of SI, the various excited states in FC transitions are well differentiated and clearly assigned at CASPT2 calculations by using the CASSCF(14,11) reference wavefunction. No obvious intruder state effect was observed in present calculations. Overall, the present CAS(14e/11o) active space is enough to describe photophysical behavior of FPt, which provides reliable basis for the understanding on the complicated phosphorescent mechanism for single-dopant white OLED.

The analytic frequency calculation is only available when the active space is not larger than 10e/8o in the present stage. Therefore, the active space must be reduced by excluding some orbitals. The  $d_{yz}$  orbital of Pt(II) center and a paired  $\pi$ ,  $\pi^*$  of acac ligand were excluded from the active space in the present second derivatives computations. These frequencies at the CAS(10,8) level of theory were only used to calculate the rate of Dexter energy transfer while the relaxation and radiative paths were computed at CAS(14e,11o)/CASPT2 level of theory.

**Figure SI-1** The frontier molecular orbitals of FPt excluded from active space.

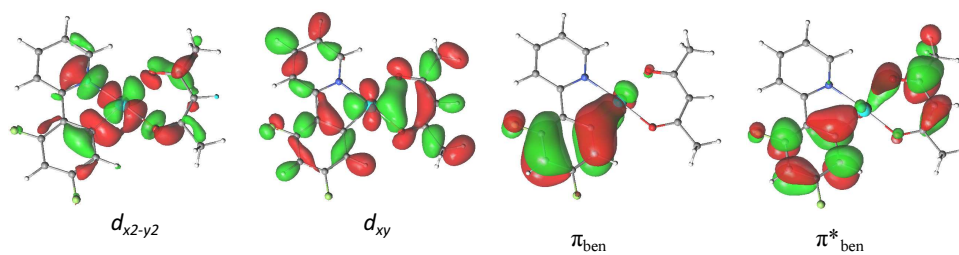

**Figure SI-2** The schematic orbitals of FPt used in defining the active space for the CASSCF(14e/11o)//CASPT2 calculation.

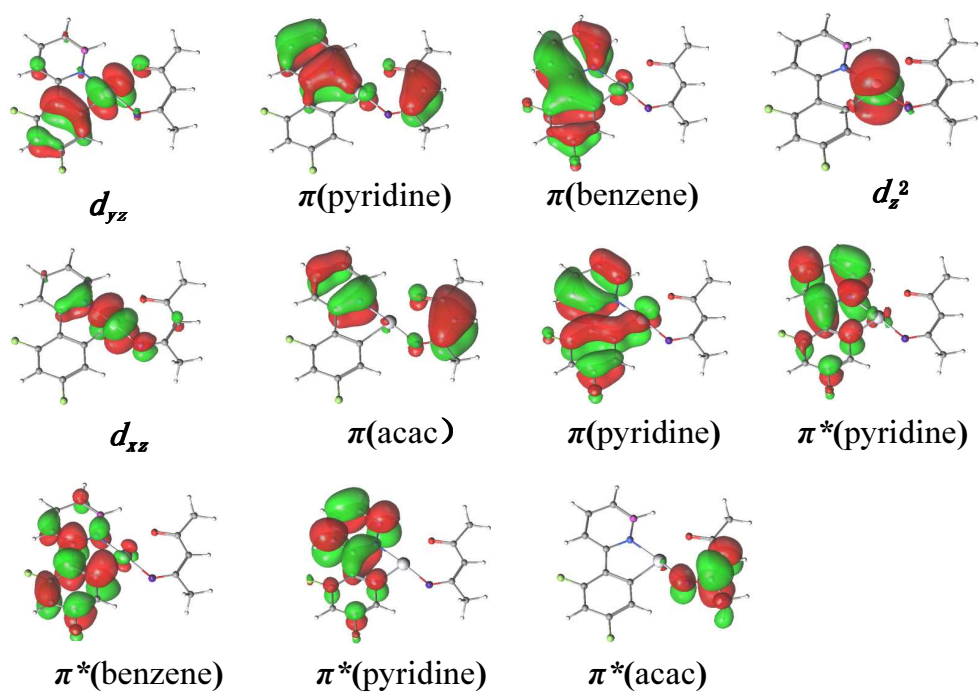

**Table SI-1** The orbital energies are shown for frontier molecular orbitals obtained at MP4 level of theory.

| Molecular orbital |                     | E(eV) | Molecular orbital |                       | E(eV) |
|-------------------|---------------------|-------|-------------------|-----------------------|-------|
| 75                | $\pi_{py}$          | -12.0 | 83                | $\pi_{ben}$           | -8.6  |
| 76                | $d_{xy}$            | -11.4 | 84                | $\pi_{ben}$           | -8.2  |
| 77                | $d_{yz}$            | -11.3 | 85                | $\pi^*_{py}$          | 1.9   |
| 78                | $\sigma_{dx^2-y^2}$ | -11.0 | 87                | $\pi^*_{py}$          | 3.0   |
| 79                | $\pi_{py}$          | -9.2  | 88                | $\pi^*_{acac}$        | 3.2   |
| 80                | $d_{xz}$            | -10.3 | 91                | $\pi^*_{ben}$         | 4.3   |
| 81                | $d_{z^2}$           | -9.7  | 92                | $\sigma^*_{dx^2-y^2}$ | 5.1   |
| 82                | $\pi_{acac}$        | -8.9  | 93                | $\pi^*_{ben}$         | 5.3   |

The of Molecular orbitals

**Table SI-2** The vertical ( $E_{\perp}$ , eV) excitation energies of FPt monomer obtained at CAS(14,11)/6-31g\*/CASPT2 and CAS(16,13)/6-31g\*/CASPT2 level of theory, respectively, and comparison with experimental values.

| cas(14,11)                                      | Vertical |             |                                   | exp.<br>$\lambda_{\text{abs}}$ | cas(16,13)                                       | Vertical |             |                        |
|-------------------------------------------------|----------|-------------|-----------------------------------|--------------------------------|--------------------------------------------------|----------|-------------|------------------------|
|                                                 | $f$      | $E_{\perp}$ | $\lambda_{\text{abs}}(\text{nm})$ |                                |                                                  | $f$      | $E_{\perp}$ | $\lambda_{\text{abs}}$ |
| $S_0$                                           | -        | 0           | -                                 |                                | $S_0$                                            | -        | -           | -                      |
| $S_0 \rightarrow S_{\text{MLCTy}}$              | 5.74E-02 | 3.51        | 353                               | 359                            | $S_0 \rightarrow S_{\text{MLCTy}}$               | 1.06E-02 | 3.89        | 319                    |
| $S_0 \rightarrow S_{\text{MLCTx}}$              | 5.58E-02 | 3.92        | 316                               | 321                            | $S_0 \rightarrow S_{\text{MLCTx}}$               | 5.83E-02 | 4.17        | 297                    |
| $S_0 \rightarrow S_{\text{MLCTz}^2}$            | 1.23E-02 | 4.13        | 300                               | 308                            | $S_0 \rightarrow S_{\text{MLCTz}^2}$             | 1.07E-02 | 4.17        | 297                    |
| $S_0 \rightarrow S_{\text{LC}}$                 | 1.65E-01 | 4.22        | 294                               | 273                            | $S_0 \rightarrow S_{\text{MLCTx(II)}}$           | 1.50E-02 | 4.82        | 257                    |
| $S_0 \rightarrow S_{\text{MLCTy(II)}}$          | 6.60E-03 | 4.62        | 268                               | -                              | $S_0 \rightarrow S_{\text{MLCTy(II)}}$           | 7.86E-03 | 4.84        | 256                    |
| $S_0 \rightarrow S_{\text{MLCTx(II)}}$          | 1.68E-01 | 4.89        | 254                               | 252                            | $S_0 \rightarrow S_{\text{MLCTz}^2(\text{II})}$  | 4.54E-05 | 5.15        | 240                    |
| $S_0 \rightarrow S_{\text{MLCTz}^2(\text{II})}$ | 6.31E-04 | 5.07        | 245                               | -                              | $S_0 \rightarrow S_{\text{MLCTz}^2(\text{III})}$ | 7.33E-03 | 6.08        | 203                    |

**Table SI-3** The assignments of different transitions for Franck-Condon geometry of FPt at CAS(14, 11)/6-31G\*/CASPT2 level of theory.

|                                           | <b>Configuration with the largest Coefficient</b>                                   |             |         | <b>CASSCF reference weight</b> |
|-------------------------------------------|-------------------------------------------------------------------------------------|-------------|---------|--------------------------------|
| <b>Root1</b>                              | Occupation                                                                          | Coefficient | Weight  | <b>0.49784</b>                 |
| <b>S0</b>                                 | 22222220000                                                                         | 0.90935     | 0.82692 |                                |
| <b>Root2</b><br><b>S<sub>MLCTz2</sub></b> | Occupation                                                                          | Coefficient | Weight  | <b>0.49914</b>                 |
|                                           | 222u222d000                                                                         | 0.95267     | 0.90758 |                                |
|                                           | The character of singly occupied orbitals                                           |             |         |                                |
|                                           | 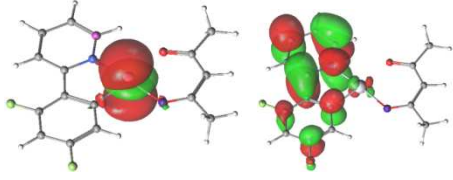   |             |         |                                |
| <b>Root3</b><br><b>S<sub>MLCTyz</sub></b> | Occupation                                                                          | Coefficient | Weight  | <b>0.49266</b>                 |
|                                           | u222222d000                                                                         | -0.73363    | 0.53822 |                                |
|                                           | The character of singly occupied orbitals                                           |             |         |                                |
|                                           |  |             |         |                                |
| <b>Root4</b><br><b>S<sub>MLCTxz</sub></b> | Occupation                                                                          | Coefficient | Weight  | <b>0.48391</b>                 |
|                                           | 2222u22d000                                                                         | -0.68634    | 0.47107 |                                |
|                                           | The character of singly occupied orbitals                                           |             |         |                                |
|                                           |  |             |         |                                |

|                                                                                     |                                                                                     |             |         |                |
|-------------------------------------------------------------------------------------|-------------------------------------------------------------------------------------|-------------|---------|----------------|
| <b>Root5</b><br><i>S<sub>MLCTz2(II)</sub></i>                                       | Occupation                                                                          | Coefficient | Weight  | <b>0.49706</b> |
|                                                                                     | 222u22200d0                                                                         | 0.93812     | 0.88008 |                |
|                                                                                     | The character of singly occupied orbitals                                           |             |         |                |
|                                                                                     | 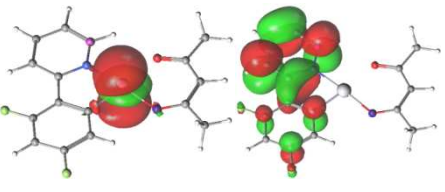   |             |         |                |
| <b>Root6</b><br><i>S<sub>MLCTxz(II)</sub></i>                                       | Occupation                                                                          | Coefficient | Weight  | <b>0.48919</b> |
|                                                                                     | 2222u22d000                                                                         | -0.754      | 0.569   |                |
|                                                                                     | The character of singly occupied orbital                                            |             |         |                |
|                                                                                     |   |             |         |                |
| <b>Root7</b><br><i>S<sub>MLCTyz(II)</sub></i>                                       | Occupation                                                                          | Coefficient | Weight  | <b>0.48792</b> |
|                                                                                     | u22222200d0                                                                         | -0.79029    | 0.62456 |                |
|                                                                                     | The character of singly occupied orbitals                                           |             |         |                |
|                                                                                     |  |             |         |                |
|                                                                                     | Occupation                                                                          | Coefficient | Weight  |                |
|                                                                                     | 2222u2200d0                                                                         | -0.42744    | 0.18271 |                |
|                                                                                     | The character of singly occupied orbitals                                           |             |         |                |
|  |                                                                                     |             |         |                |



|                                           | Occupation                                                                        | Coefficient | Weight  |                |
|-------------------------------------------|-----------------------------------------------------------------------------------|-------------|---------|----------------|
| <b>Root8</b><br><br><b>S<sub>LC</sub></b> | 2u22222d00<br>0                                                                   | 0.80557     | 0.64895 | <b>0.47108</b> |
|                                           | The character of singly occupied orbitals                                         |             |         |                |
|                                           | 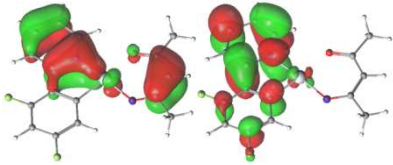 |             |         |                |

**Table SI-4** Frequencies( $\text{cm}^{-1}$ ) are shown for  $S_0$ ,  $T_{LC}$  and  $T_{MLCTx}$  minima of FPt monomer at the CAS(10,8)/6-31G\* level of theory.

$S_0$

|           |          |          |          |          |
|-----------|----------|----------|----------|----------|
| 39.1203   | 44.971   | 58.8264  | 73.5431  | 84.5367  |
| 100.3804  | 105.8128 | 134.7512 | 168.9668 | 173.3876 |
| 187.5743  | 208.3353 | 222.4109 | 231.2458 | 245.7213 |
| 264.1892  | 270.2263 | 286.8521 | 296.5515 | 336.3463 |
| 377.7613  | 385.4392 | 434.1263 | 460.8471 | 469.3151 |
| 485.7472  | 566.6043 | 568.6996 | 619.5021 | 623.5576 |
| 633.8177  | 651.7056 | 670.1413 | 700.5833 | 721.1738 |
| 738.1791  | 749.3251 | 787.8521 | 794.5137 | 835.1159 |
| 847.2819  | 863.6631 | 896.0832 | 924.1482 | 943.9957 |
| 988.8421  | 1019.604 | 1037.503 | 1050.425 | 1084.058 |
| 1088.9134 | 1133.208 | 1133.533 | 1134.184 | 1149.378 |
| 1161.247  | 1162.613 | 1173.479 | 1192.687 | 1209.714 |
| 1242.312  | 1288.916 | 1303.292 | 1320.688 | 1352.476 |
| 1400.1389 | 1402.468 | 1438.006 | 1459.492 | 1518.866 |
| 1551.7842 | 1555.846 | 1570.64  | 1577.952 | 1612.66  |
| 1621.1788 | 1622.078 | 1626.036 | 1632.812 | 1652.73  |
| 1702.584  | 1730.92  | 1779.652 | 1784.398 | 1790.094 |
| 1811.5707 | 3216.059 | 3217.803 | 3277.365 | 3280.512 |
| 3308.5309 | 3310.12  | 3379.795 | 3400.885 | 3401.889 |
| 3405.3598 | 3421.381 | 3439.192 | 3466.359 |          |

$T_{MLCTx}$

|           |          |          |          |          |
|-----------|----------|----------|----------|----------|
| 38.3297   | 41.8998  | 52.6257  | 59.0087  | 79       |
| 80.5154   | 123.5088 | 131.7901 | 163.0554 | 171.6667 |
| 187.7882  | 193.9731 | 205.1407 | 215.7128 | 243.9643 |
| 264.3898  | 268.9828 | 288.5372 | 299.686  | 324.2426 |
| 346.2948  | 391.8664 | 396.1365 | 435.6321 | 457.0523 |
| 473.6477  | 495.3723 | 567.5552 | 610.8071 | 612.895  |
| 630.8392  | 645.4679 | 646.5065 | 667.2865 | 675.5196 |
| 682.4214  | 710.6654 | 733.6119 | 747.0198 | 763.917  |
| 781.3153  | 853.4838 | 869.3294 | 923.9336 | 947.5513 |
| 950.2178  | 972.0121 | 1008.902 | 1011.405 | 1015.95  |
| 1033.5246 | 1056.424 | 1097.861 | 1101.261 | 1135.526 |
| 1138.5852 | 1146.018 | 1163.894 | 1172.163 | 1174.699 |
| 1226.6278 | 1247.291 | 1295.992 | 1333.756 | 1343.487 |
| 1381.7724 | 1404.178 | 1423.911 | 1445.937 | 1496.426 |
| 1515.5122 | 1552.132 | 1556.249 | 1557.806 | 1581.017 |
| 1603.9554 | 1611.425 | 1618.963 | 1619.816 | 1622.106 |
| 1634.1517 | 1675.451 | 1736.915 | 1796.218 | 1810.763 |
| 1825.52   | 3218.091 | 3221.319 | 3281.071 | 3286.193 |
| 3310.8923 | 3317.056 | 3378.426 | 3395.773 | 3407.232 |
| 3414.8056 | 3421.05  | 3434.562 | 3436.683 |          |

### T<sub>LC</sub>

|           |          |          |          |          |
|-----------|----------|----------|----------|----------|
| 32.1034   | 38.2573  | 47.5643  | 56.3028  | 74.6265  |
| 84.1676   | 98.8427  | 129.3698 | 156.0919 | 170.7737 |
| 183.7328  | 210.4896 | 216.8707 | 219.6214 | 232.8524 |
| 259.269   | 270.1797 | 271.3398 | 286.2073 | 295.1057 |
| 332.1656  | 375.3719 | 398.9278 | 413.4671 | 427.0339 |
| 462.0473  | 468.9304 | 496.3371 | 567.684  | 598.5243 |
| 604.2435  | 626.3395 | 632.9585 | 645.0619 | 664.1619 |
| 688.7567  | 692.8215 | 728.7143 | 737.9445 | 748.3376 |
| 797.926   | 815.0069 | 849.5547 | 908.6962 | 918.4092 |
| 952.9287  | 965.2483 | 996.606  | 1021.666 | 1038.835 |
| 1040.3433 | 1083.362 | 1113.31  | 1123.812 | 1135.729 |
| 1150.0094 | 1163.06  | 1173.34  | 1173.48  | 1205.373 |
| 1249.3893 | 1255.973 | 1307.591 | 1340.393 | 1356.999 |
| 1364.609  | 1404.901 | 1424.981 | 1507.481 | 1527.336 |
| 1531.5313 | 1551.856 | 1555.617 | 1556.347 | 1566.903 |
| 1583.7183 | 1621.018 | 1622.129 | 1626.276 | 1633.48  |
| 1710.1914 | 1717.764 | 1764.66  | 1772.229 | 1814.01  |
| 1877.8922 | 3216.001 | 3218.873 | 3277.094 | 3281.727 |
| 3309.9841 | 3311.287 | 3392.812 | 3401.22  | 3410.084 |
| 3417.6175 | 3422.169 | 3427.479 | 3462.114 |          |

## 1.2 Computational details for energy transfer calculation

The Franck-Condon factor is calculated in the use of eq. 2, 4, 5, and 6 by the following procedure:

(1) The Huang-Rhys factor  $S_j$  and the temperature-related factor  $n_j$  are calculated by using eq. 5 and 6, where  $\omega_j$  is the vibrational frequency of the harmonic oscillator on the corresponding electronic state for the  $j$ th normal mode, which can be obtained from the frequency analysis by using Gaussian 03 program. The  $\Delta Q$  is the displacement of the oscillator during the transition between two electronic states, which is calculated as

$$\Delta Q = |L| \cdot \Delta q$$

where  $\Delta q$  is the displacement of the mass-weighted Cartesian coordinates, and  $|L|$  is the normal mode matrix obtained from the frequency analysis.

(2) The correlation function  $G_j(t)$  can be calculated easily by applying eq. 5 and 6 into eq. 4.

(3) Finally, the Franck-Condon factor ( $FC$ ) is obtained by applying  $G_j(t)$  into eq. 2. The saddle-point method yields

$$FC = \sqrt{\frac{1}{2\pi\hbar^2 a}} \exp\left\{\sum_j S_j [(n_j + 1)e^{it^* \omega_j} + n_j e^{-it^* \omega_j} - (2n_j + 1)] + it^* \omega_{i \rightarrow f}\right\}$$

where

$$a = \sum_j S_j \omega_j^2 [(n_j + 1)e^{it^* \omega_j} + n_j e^{-it^* \omega_j}]$$

and  $t^*$  is the saddle-point value determined by

$$\sum_j S_j \omega_j [(n_j + 1)e^{it^* \omega_j} - n_j e^{-it^* \omega_j}] + \omega_{i \rightarrow f} = 0$$

On the other hand, the Hamiltonian matrix element is calculated by using eq. 8, where the two-electron integrals ( $ij|kl$ ) and the singly occupied orbital coefficients  $c$  can be obtained from the CASSCF calculation on the FPT dimer in the triplet charge-transfer state by using Gaussian 03 program.

### 1.3 Estimation on the average distance between two molecules

The molecular volume ( $V$ ) of FPt can be directly calculated according to  $V = 100M / (\rho \times \text{wt} \times N_A)$ , where  $M = 484$  g/mol is the molecular weight of FPt,  $\rho = 1.2$  g/cm<sup>3</sup> is typical density of organic films, and  $N_A$  is the Avogadro's number.<sup>1</sup> Then the average distance between two molecules ( $R$ ) is obtained by  $V = 4\pi R^3/3$ .

[1] J. Kalinowski, M. Cocchi, V. Fattori, L. Murphy, J. A. G. Williams, *Organic electronics*, 2010, 11, 724-730.

### 1.4 Error analysis

As mentioned in the Computational Methods, the Franck-Condon factor and Hamiltonian matrix element were computed independently during the calculation of energy transfer rate. Thus, there are two main error sources of the Dexter energy transfer calculation. One comes from the Franck-Condon factor calculation. In the present work, two approximations, the harmonic and displaced approximation were introduced. The two approximations with their errors have been discussed for several decades, and the results agree well with the experimental findings when the structural rigidity of molecule during its excitation and relaxation processes is strong. The electronic structure calculation shows that the FPt monomer is consistent with this case, so the error from the Franck-Condon factor calculation is small. Another comes from the Hamiltonian matrix element calculation. It should be noted that no more approximation was introduced in Eq. 8, and all parameters in the equation were obtained from the wavefunction of FPt dimer in the triplet charge-transfer state. Thus, the error from the Hamiltonian matrix element calculation is mainly determined by

the accuracy of electronic structure calculations. Although the CASSCF calculation on FPt dimer with 70 atoms and 2 heavy Pt atoms is very difficult, the calculated properties such as geometry and dipole moment show that it does not lead to obvious errors compared with the CASSCF calculation on the FPt monomer.

## Section 2, Results and Discussion

**2.1 The nature of excited states and absorption spectrum of FPt.** Table 1 summarized the vertical and adiabatic transition energies for the FPt monomer as well as other properties. To assess the accuracy of the electronic structure calculations, we first analyze the optical absorption characteristics. The FPt in the ground state adopts  $C_s$  symmetry that is confirmed to be a minimum by frequency calculations. The geometric structures of FPt in all excited states were calculated to have planar or quasi-planar arrangement. For the convenience of discussion and comparison, the orientations N-Pt-O1 and C-Pt-O2 are defined to be  $x$  and  $y$  axis of molecular plane (see Figure 1 for the Cartesian axes), respectively. As shown in Table 1,  $S_0 \rightarrow S_{MLCTy}$  transition was found to originate from the promotion of one electron from the  $d_{yz}$  orbital of Pt to a  $\pi^*$  orbital mainly localized in the pyridinyl ring moiety. Mulliken population analysis shows that  $\sim 0.5$  electron transfers from the Pt to the pyridinyl ring upon  $S_0 \rightarrow S_{MLCTy}$  excitation along  $x$  direction. The dipole moment consequently increases from  $-4.67$  D in the ground state to  $0.48$  D in the  $S_{MLCTy}$  state along  $x$  direction. Meanwhile, the electron redistribution also results in a dipole moment change ( $3.52$  D) along  $y$  direction. This is different from the cases in Pt-4 with high  $C_{2v}$  symmetry where the change of dipole moment occurs along the specific one direction of  $y$  axis.<sup>1</sup> In the  $y$  direction of Pt-4, the electron donor Cl atom pushes the electron to the Pt(II) center, whereas the electron withdrawing F substitutes attract the electron towards the benzene ring.<sup>1</sup> In the  $x$  direction of Pt-4, however, the two symmetric pyridinyl rings on the both sides of  $C_2$  axis exert the same influence on Pt(II) center. Although there are large changes of dipole moment along  $x$  and  $y$  direction, respectively, upon  $S_0 \rightarrow S_{MLCTy}$  excitation of FPt, the coupling of dipole moment along two dimensions results in the smaller total dipole moment change ( $0.82$  D) in comparison with that of Pt-4 ( $3.54$  D). This is caused by decreasing symmetry from  $C_{2v}$  of Pt-4 to  $C_s$  of FPt. Consequently, the direction-specific charge transfer of FPt induced by electron excitation does not proceeds as well as that in Pt-4.

As illustrated in Table 1, one singly occupied electron for  $S_0 \rightarrow S_{MLCTy}$  transition of FPt mainly distributes on the pyridinyl moiety. In contrast with this, the corresponding transition for Pt-4 leads to singly occupied electron being populated in the benzene ring. To address this discrepancy, we analyzed the orbital energies of Pt-4 and FPt at MP4 level. The energy of  $\pi^*$  orbital mainly located on pyridinyl moiety is  $2.40$  eV lower than that located on benzene ring in FPt, while in Pt-4 the energy of  $\pi^*$



orbital on pyridinyl ring is 0.08 eV slightly higher than that on benzene ring. This indicates that  $\pi^*$  orbital of benzene ring functions as an efficient acceptor when electron in Pt(II)  $d_{yz}$  orbital is excited in Pt-4. However, it becomes energetically unfavorable for  $S_0 \rightarrow S_{MLCTy}$  transition in FPt and the  $\pi^*$  orbital on pyridinyl ring alternatively serves as major acceptor of excited electron.

The inter-ligand charge-transfer (ILCT) state was found in Pt-4 originating from electron transfer along the direction from pyridinyl to benzene ring.<sup>1</sup> However,  $S_0 \rightarrow S_{ILCT}$  or  $S_0 \rightarrow T_{ILCT}$  transition was not found in vertical excitations of FPt (see Table 1) and minima optimization attempts for ILCT of FPt lead to failure. To account for these differences between FPt and Pt-4, we calculated the orbital energies of different ligands for these two molecules at MP4 level of theory to explore changes of transition possibility varying with chemical environment. Quantitatively, the energy level of  $\pi^*$  orbital on benzene moiety is close to that on pyridine ring ( $\Delta E = 0.08$  eV) in Pt-4. Therefore, occurrence of electron migration between two moieties is feasible. In contrast, large energy gap (2.40 eV) between the  $\pi^*$  orbitals on benzene moiety and pyridinyl moiety of FPt leads to high energy level of ILCT state beyond low energy excitation at  $\lambda > 300$  nm. We also examined an FPt analogue without F substitution, Pt(II) [2-pyridinato- $N, C^{2'}$ ](2,4-pentanedionato) ( $C^{\wedge}NPt(O^{\wedge}O)$ ). The  $\pi^*$  orbital on pyridinyl is found to be  $\sim 2.67$  eV lower than the  $\pi^*$  orbital on benzene ring. Therefore, benzene ring moiety without F substitution leads to large  $\pi^*$  orbital energy gap which reduces the migration possibilities of excited  $d_{yz}$  electron towards the direction of C-Pt-O2 ( $y$  axis). This allows electron transfer to exhibit much more character of the unique or specific direction (N-Pt-O1( $x$  axis)) in comparison with the case in FPt. This can partially account for why the quantum efficiency of blue emission of FPt ( $\Phi=0.02$ ) is lower than that of its analogue without F substitution ( $\Phi=0.15$ ).<sup>2</sup>

Like  $S_0 \rightarrow S_{MLCTy}$  transition of FPt, both  $S_0 \rightarrow S_{MLCTx}$  and  $S_0 \rightarrow S_{MLCTz}^2$  are MLCT excitations. They are attributed to the electron transition from  $d_{xz}$  and  $d_z^2$  to the  $\pi^*$  orbital of pyridine ring, respectively. Mulliken population analysis shows that  $\sim 0.5$  electron is transferred from Pt to pyridinyl ring along the  $x$  direction for the  $S_0 \rightarrow S_{MLCTz}^2$  transitions. The dipole moments for  $S_0 \rightarrow S_{MLCTx}$  and  $S_0 \rightarrow S_{MLCTz}^2$  are consequently increased to 0.17 and 1.77 D along the  $x$  direction and 7.34 and 7.30 D along the  $y$  direction, respectively. As shown in Table 1,  $S_0 \rightarrow S_{LC}$  and  $S_0 \rightarrow T_{LC}$  transitions mainly take place on phenylpyridinyl ligand and are assigned to be ligand

centered (LC) excitation. The wave function of unpaired electron in  $S_0 \rightarrow T_{LC}$  transition can be presented as

$$\phi_{T_{LC}^1} = 11.4\%d_{yz} + 58.9\%\pi_{\text{pyridine}} + 29.7\%\pi_{\text{benzene}}$$

and

$$\phi_{T_{LC}^2} = 2.9\%d_{xz} + 66.2\%\pi_{\text{pyridine}} + 30.9\%\pi_{\text{benzene}}$$

This unequivocally reveals that  $S_0 \rightarrow T_{LC}$  is ligand center transition with small contribution from Pt. In contrast with  $S_0 \rightarrow T_{LC}$  excitation,  $S_0 \rightarrow S_{LC}$  transition is partially intruded by  $d_{yz}$  orbital of Pt(II) center, where wave functions of singly occupied electrons are expressed as

$$\phi_{S_{LC}^1} = 23.2\%d_{yz} + 55.5\%\pi_{\text{pyridine}} + 21.3\%\pi_{\text{benzene}}$$

and

$$\phi_{S_{LC}^2} = 2.1\%d_{xz} + 1.7\%p_z(\text{Pt}) + 84.3\%\pi_{\text{pyridine}} + 11.9\%\pi_{\text{benzene}}$$

As illustrated in Table 1,  $S_0 \rightarrow S_{\text{mix}}$  and  $S_0 \rightarrow S_{LC}$  transitions have the largest oscillator strength ( $f = \sim 0.160$ ) whose vertical excitation energies are calculated to be 4.89 eV (254 nm) and 4.22 eV (294 nm), respectively. It is very difficult to determine the nature of  $S_{\text{mix}}$  excitation that probably originates from the mixture among several MLCT and LC transitions. In consistent with our computation, two intense absorption bands of FPt were observed to peak at 252 and 273 nm in solution.<sup>2-5</sup> Thompson and co-workers assigned these two bands to ligand-centered transition. Meanwhile, they considered MLCT transition to be the weak absorption at  $\lambda > 300$  nm region. Three absorption bands are experimentally observed at 308, 321, and 359 nm,<sup>2-5</sup> which are very close to our theoretical values, i.e., 301 nm (4.12 eV), 316 nm (3.92 eV) and 353 nm (3.51 eV). The nature of three absorption bands is assigned to  $S_0 \rightarrow S_{\text{MLCT}z}$ ,  $S_0 \rightarrow S_{\text{MLCT}x}$  and  $S_0 \rightarrow S_{\text{MLCT}y}$  excitation, respectively, in this work. The weak  $S_0 \rightarrow T_n$  vertical excitations were also calculated by using the spin-orbit coupling computation (see Table 1). The lowest lying  $S_0 \rightarrow T_{LC}$  absorption was calculated at 446 nm (2.78 eV,  $f = 2.44 \times 10^{-6}$ ) that agrees well with experimental value 469 nm.<sup>3-5</sup> Overall, the present electronic structure calculations on the monomer of FPt give accurate electronic transition energies and provide clear molecular orbital pictures for the MLCT and LC transitions.

- [1] J. Han, X. B. Chen, L. Shen, Y. Chen, W. H. Fang and H. B. Wang, *Chem. Eur. J.*, 2011, **17**, 13971.
- [2] J. Brooks, Y. Babayan, S. Lamansky, P. I. Djurovich, I. Tsyba, R. Bau and M. E. Thompson, *Inorg. Chem.*, 2002, **41**, 3055.
- [3] X. H. Yang, Z. X. Wang, S. Madakuni, J. Li and G. E. Jabbour, *Adv. Mater.*, 2008, **20**, 2405.
- [4] A. F. Rausch, H. H. H. Homeier and H. Yersin, *Top. Organomet. Chem.*, 2010, **29**, 193.
- [5] B. W. Ma, P. I. Djurovich and M. E. Thompson, *Coordin. Chem. Rev.*, 2005, **249**, 1501.

**Figures SI-3** The optimized structures and the character of singly occupied orbitals of  $T_{CT}(\text{dimer})$  state.

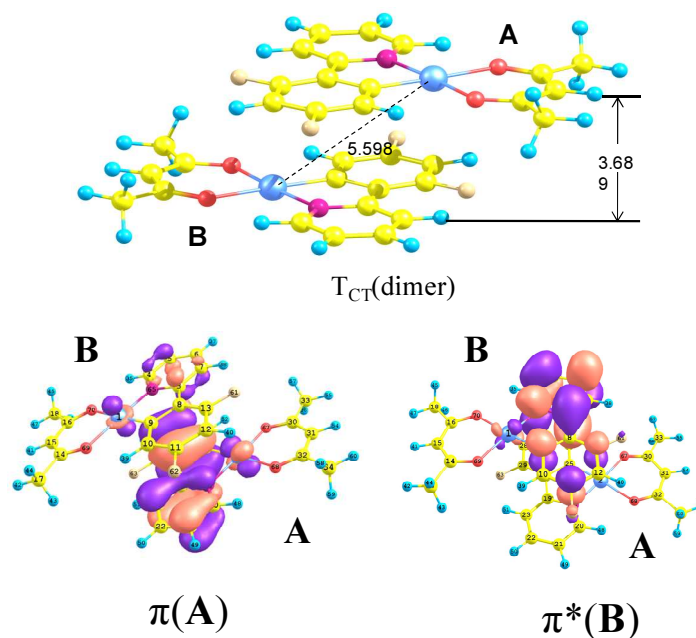

**Table SI-5** The absolute energies (A. E.) in Hartree the optimized structures of FPt at the CAS(14,11)/6-31G\*/CASPT2 level of theory.

| States                                             | A. E. (CASSCF) | A. E. (CASPT2) |
|----------------------------------------------------|----------------|----------------|
| S <sub>0</sub>                                     | -1134.83706    | -1137.82793    |
| S <sub>MLCTy</sub>                                 | -1134.73295    | -1137.71599    |
| S <sub>0</sub> *(S <sub>MLCTy</sub> )              | -1134.83974    | -1137.82583    |
| S <sub>MLCTz</sub> <sup>2</sup>                    | -1134.73439    | -1137.69460    |
| S <sub>0</sub> *(S <sub>MLCTz</sub> <sup>2</sup> ) | -1134.83911    | -1137.82661    |
| S <sub>LC</sub>                                    | -1134.63395    | -1137.67945    |
| S <sub>0</sub> *(S <sub>LC</sub> )                 | -1134.83599    | -1137.82395    |
| SCT(S <sub>MLCTy</sub> )                           | -1134.73068    | -1137.71331    |
| SCT(T <sub>MLCTx</sub> )                           | -1134.72864    | -1137.71915    |
| T <sub>LC</sub>                                    | -1134.73447    | -1137.74186    |
| S <sub>0</sub> *(T <sub>LC</sub> )                 | -1134.81992    | -1137.81400    |
| T <sub>MLCTx</sub> (T <sub>MLCTy</sub> )           | -1134.74975    | -1137.73468    |
| S <sub>0</sub> *                                   | -1134.83178    | -1137.82011    |
| T <sub>MLCTy</sub>                                 | -1134.67763    | -1137.70507    |
| S <sub>0</sub> *(T <sub>MLCTy</sub> )              | -1134.83718    | -1137.82621    |
| T <sub>MLCTz</sub> <sup>2</sup>                    | -1134.73863    | -1137.70166    |
| S <sub>0</sub> *(T <sub>MLCTz</sub> <sup>2</sup> ) | -1134.83733    | -1137.82615    |
| SCT(T <sub>MLCTx</sub> ) <sup>a</sup>              | -1134.73933    | -1137.72788    |
| SCT(T <sub>LC</sub> ) <sup>a</sup>                 | -1134.72313    | -1137.71351    |

<sup>a</sup> SCT(T<sub>MLCTx</sub>) and SCT(T<sub>LC</sub>) are avoided crossings.

**Table SI-6** The absolute energies (A. E.) in Hartree and relative energies (R. E.) in eV for the point of radiative relaxation path of the FPt monomer induced by the excitation obtained by CASSCF(14e/11o)/CASPT2 computations.

|                          | A. E.        | R. E. |
|--------------------------|--------------|-------|
| <b>Path 1</b>            |              |       |
| FC-S <sub>MLCTy</sub>    | -1137.699110 | 3.51  |
| S <sub>MLCTy-1</sub>     | -1137.714893 | 3.08  |
| S <sub>MLCTy-2-min</sub> | -1137.715840 | 3.05  |
| S <sub>MLCTy-3</sub>     | -1137.715325 | 3.06  |
| S <sub>MLCTy-4</sub>     | -1137.714938 | 3.07  |
| SCT(S <sub>MLCTy</sub> ) | -1137.713308 | 3.12  |
| <b>Path 2</b>            |              |       |
| SCT(T <sub>MLCTx</sub> ) | -1137.719172 | 2.96  |
| SCT→T <sub>MLCTx-1</sub> | -1137.716940 | 3.02  |
| SCT→T <sub>MLCTx-2</sub> | -1137.717699 | 3.00  |
| SCT→T <sub>MLCTx-3</sub> | -1137.732380 | 2.60  |
| SCT→T <sub>MLCTx-4</sub> | -1137.734489 | 2.54  |
| T <sub>MLCTx-min</sub>   | -1137.734489 | 2.54  |
| <b>Path 3</b>            |              |       |
| FC-T <sub>LC</sub>       | -1137.713412 | 3.12  |
| T <sub>LC-1</sub>        | -1137.731123 | 2.63  |
| T <sub>LC-2</sub>        | -1137.733381 | 2.57  |
| T <sub>LC-3</sub>        | -1137.734489 | 2.54  |
| T <sub>LC-4</sub>        | -1137.734494 | 2.54  |
| T <sub>LC-min</sub>      | -1137.741860 | 2.34  |

**Section 3**, Cartesian coordinate of the optimized structures for FPt at the  
CAS(14,11)/6-31G\* level of theory

S<sub>0</sub>

|     |           |           |           |
|-----|-----------|-----------|-----------|
| PT  | 0.008892  | 0.606872  | 0.000218  |
| C1  | -1.583646 | -1.829693 | 0.000081  |
| C2  | -2.946428 | 0.068026  | 0.000087  |
| C3  | -4.098699 | -0.692971 | -0.000022 |
| C4  | -3.969554 | -2.080330 | -0.000077 |
| C5  | -2.721328 | -2.647918 | -0.000024 |
| C6  | -0.174926 | -2.275564 | 0.000083  |
| C7  | 0.801890  | -1.232686 | 0.000148  |
| C8  | 2.133941  | -1.562005 | 0.000096  |
| C9  | 2.511130  | -2.904724 | -0.000022 |
| C10 | 1.611692  | -3.929560 | -0.000087 |
| C11 | 0.260917  | -3.583910 | -0.000024 |
| C12 | 1.979114  | 2.830011  | -0.000016 |
| C13 | 1.003604  | 3.828897  | -0.000230 |
| C14 | -0.387797 | 3.613451  | -0.000009 |
| C15 | 3.433835  | 3.231781  | 0.000006  |
| C16 | -1.308066 | 4.810503  | -0.000005 |
| H1  | -2.961487 | 1.138638  | 0.000122  |
| H2  | -5.059113 | -0.214714 | -0.000071 |
| H3  | -4.842614 | -2.706943 | -0.000171 |
| H4  | -2.607849 | -3.710151 | -0.000083 |
| H5  | 2.893418  | -0.804502 | 0.000123  |
| H6  | 1.916946  | -4.956951 | -0.000191 |

|                    |           |           |           |
|--------------------|-----------|-----------|-----------|
| H7                 | 1.341977  | 4.845433  | -0.000402 |
| H8                 | 3.573492  | 4.304357  | -0.000201 |
| H9                 | 3.915056  | 2.807207  | 0.874416  |
| H10                | 3.915182  | 2.806849  | -0.874159 |
| H11                | -1.947578 | 4.760164  | -0.874844 |
| H12                | -1.947273 | 4.760394  | 0.875070  |
| H13                | -0.776164 | 5.752054  | -0.000220 |
| F1                 | -0.610851 | -4.597497 | -0.000122 |
| F2                 | 3.806817  | -3.195579 | -0.000093 |
| N                  | -1.730070 | -0.492783 | 0.000139  |
| O1                 | 1.797117  | 1.584605  | 0.000246  |
| O2                 | -0.961764 | 2.506431  | 0.000240  |
| $S_{\text{MLCTy}}$ |           |           |           |
| PT                 | 0.582582  | 0.075646  | -0.003397 |
| C1                 | -1.968395 | 1.408444  | 0.002985  |
| C2                 | -0.142970 | 2.971668  | -0.001512 |
| C3                 | -0.970620 | 4.023839  | 0.008093  |
| C4                 | -2.400030 | 3.793976  | 0.017376  |
| C5                 | -2.865226 | 2.499879  | 0.014791  |
| C6                 | -2.260661 | 0.007954  | 0.001846  |
| C7                 | -1.149289 | -0.870473 | 0.001073  |
| C8                 | -1.304804 | -2.269341 | 0.002134  |
| C9                 | -2.563832 | -2.772789 | 0.003696  |
| C10                | -3.704916 | -1.951749 | 0.004091  |
| C11                | -3.539910 | -0.608988 | 0.002632  |
| C12                | 2.954289  | -1.742367 | 0.013472  |

|                |           |           |           |
|----------------|-----------|-----------|-----------|
| C13            | 3.870457  | -0.700166 | 0.020194  |
| C14            | 3.561821  | 0.677712  | 0.007013  |
| C15            | 3.457159  | -3.163398 | 0.024556  |
| C16            | 4.683515  | 1.682933  | 0.006948  |
| H1             | 0.922010  | 3.092314  | -0.010220 |
| H2             | -0.570182 | 5.019991  | 0.007027  |
| H3             | -3.085487 | 4.620521  | 0.026431  |
| H4             | -3.917894 | 2.305982  | 0.021503  |
| H5             | -0.456273 | -2.924544 | 0.002025  |
| H6             | -4.687882 | -2.381999 | 0.005553  |
| H7             | 4.908383  | -0.963283 | 0.033073  |
| H8             | 4.536534  | -3.226297 | 0.040338  |
| H9             | 3.054581  | -3.671333 | 0.894208  |
| H10            | 3.080090  | -3.675730 | -0.853925 |
| H11            | 4.595424  | 2.299364  | -0.881069 |
| H12            | 4.566593  | 2.332978  | 0.866963  |
| H13            | 5.661380  | 1.223141  | 0.031185  |
| F1             | -4.628857 | 0.155211  | 0.005255  |
| F2             | -2.761080 | -4.089518 | 0.006018  |
| N              | -0.584021 | 1.671082  | -0.003643 |
| O1             | 1.685997  | -1.652577 | -0.002342 |
| O2             | 2.414144  | 1.172353  | -0.007911 |
| $S_{MLCT_z}^2$ |           |           |           |
| PT             | 0.012566  | 0.578771  | -0.077649 |
| C1             | -1.655086 | -1.776023 | -0.022454 |
| C2             | -2.931609 | 0.249736  | -0.079889 |



|     |           |           |           |
|-----|-----------|-----------|-----------|
| C3  | -4.091017 | -0.414365 | -0.004475 |
| C4  | -4.070256 | -1.857975 | 0.087213  |
| C5  | -2.854061 | -2.501110 | 0.087088  |
| C6  | -0.296382 | -2.234149 | -0.031163 |
| C7  | 0.714011  | -1.274046 | -0.044839 |
| C8  | 2.068330  | -1.614348 | -0.041586 |
| C9  | 2.398171  | -2.937897 | -0.027755 |
| C10 | 1.434653  | -3.947014 | -0.017410 |
| C11 | 0.127306  | -3.581236 | -0.020206 |
| C12 | 2.109822  | 2.693585  | 0.013947  |
| C13 | 1.211385  | 3.740790  | 0.042802  |
| C14 | -0.194521 | 3.625042  | -0.025360 |
| C15 | 3.588787  | 2.979548  | 0.061628  |
| C16 | -1.027414 | 4.885448  | -0.018435 |
| H1  | -2.888835 | 1.316909  | -0.135175 |
| H2  | -5.022024 | 0.120910  | -0.005900 |
| H3  | -4.983958 | -2.412668 | 0.167305  |
| H4  | -2.812766 | -3.567623 | 0.163983  |
| H5  | 2.837573  | -0.869103 | -0.054346 |
| H6  | 1.717319  | -4.980970 | -0.011468 |
| H7  | 1.618749  | 4.728335  | 0.101163  |
| H8  | 3.812336  | 4.035136  | 0.117483  |
| H9  | 4.013456  | 2.474087  | 0.921714  |
| H10 | 4.051389  | 2.558723  | -0.824016 |
| H11 | -1.621879 | 4.921283  | -0.924494 |
| H12 | -1.712847 | 4.852576  | 0.821117  |

|                 |           |           |           |
|-----------------|-----------|-----------|-----------|
| H13             | -0.424856 | 5.780504  | 0.048110  |
| F1              | -0.790280 | -4.546028 | -0.010370 |
| F2              | 3.678739  | -3.305114 | -0.029481 |
| N               | -1.718650 | -0.381885 | -0.080725 |
| O1              | 1.851753  | 1.456333  | -0.052087 |
| O2              | -0.834499 | 2.559500  | -0.094268 |
| S <sub>LC</sub> |           |           |           |
| PT              | 0.005378  | 0.615708  | 0.000000  |
| C1              | -1.614310 | -1.821940 | 0.000000  |
| C2              | -2.950476 | 0.107539  | 0.000000  |
| C3              | -4.108708 | -0.620871 | 0.000000  |
| C4              | -4.061750 | -2.038652 | 0.000000  |
| C5              | -2.768737 | -2.626118 | 0.000000  |
| C6              | -0.254252 | -2.263164 | 0.000000  |
| C7              | 0.746453  | -1.212571 | 0.000000  |
| C8              | 2.113151  | -1.559093 | 0.000000  |
| C9              | 2.462940  | -2.878760 | 0.000000  |
| C10             | 1.511334  | -3.935008 | 0.000000  |
| C11             | 0.203010  | -3.619135 | 0.000000  |
| C12             | 2.058193  | 2.782806  | 0.000000  |
| C13             | 1.110349  | 3.804237  | 0.000000  |
| C14             | -0.288762 | 3.625319  | 0.000000  |
| C15             | 3.523201  | 3.149356  | 0.000000  |
| C16             | -1.181283 | 4.842654  | 0.000000  |
| H1              | -2.983839 | 1.177583  | 0.000000  |
| H2              | -5.045635 | -0.100058 | 0.000000  |

|                              |           |           |           |
|------------------------------|-----------|-----------|-----------|
| H3                           | -4.944787 | -2.636980 | 0.000000  |
| H4                           | -2.670373 | -3.689380 | 0.000000  |
| H5                           | 2.865144  | -0.793806 | 0.000000  |
| H6                           | 1.835504  | -4.959711 | 0.000000  |
| H7                           | 1.474094  | 4.812150  | 0.000000  |
| H8                           | 3.689039  | 4.218389  | 0.000000  |
| H9                           | 3.995280  | 2.714936  | 0.874680  |
| H10                          | 3.995280  | 2.714936  | -0.874680 |
| H11                          | -1.822159 | 4.804752  | -0.874362 |
| H12                          | -1.822159 | 4.804752  | 0.874362  |
| H13                          | -0.629043 | 5.772173  | 0.000000  |
| F1                           | -0.681705 | -4.607118 | 0.000000  |
| F2                           | 3.737473  | -3.235042 | 0.000000  |
| N                            | -1.718226 | -0.420991 | 0.000000  |
| O1                           | 1.841433  | 1.540752  | 0.000000  |
| O2                           | -0.890185 | 2.534426  | 0.000000  |
| SCT( $S_{MLCTy}/T_{MLCTx}$ ) |           |           |           |
| PT                           | 0.001570  | 0.584272  | 0.000000  |
| C1                           | -1.663283 | -1.757025 | 0.000000  |
| C2                           | -2.938483 | 0.250974  | 0.000000  |
| C3                           | -4.100514 | -0.417658 | 0.000000  |
| C4                           | -4.078660 | -1.853712 | 0.000000  |
| C5                           | -2.855050 | -2.494273 | 0.000000  |
| C6                           | -0.304648 | -2.243111 | 0.000000  |
| C7                           | 0.707821  | -1.267230 | 0.000000  |
| C8                           | 2.061767  | -1.622587 | 0.000000  |

|     |           |           |           |
|-----|-----------|-----------|-----------|
| C9  | 2.393336  | -2.942533 | 0.000000  |
| C10 | 1.430023  | -3.952386 | 0.000000  |
| C11 | 0.120230  | -3.591950 | 0.000000  |
| C12 | 2.128080  | 2.701283  | 0.000000  |
| C13 | 1.219552  | 3.762955  | 0.000000  |
| C14 | -0.172375 | 3.631278  | 0.000000  |
| C15 | 3.609846  | 2.985583  | 0.000000  |
| C16 | -1.034516 | 4.866382  | 0.000000  |
| H1  | -2.919021 | 1.319456  | 0.000000  |
| H2  | -5.023859 | 0.121366  | 0.000000  |
| H3  | -4.988409 | -2.415606 | 0.000000  |
| H4  | -2.805932 | -3.560851 | 0.000000  |
| H5  | 2.839183  | -0.884533 | 0.000000  |
| H6  | 1.711518  | -4.987391 | 0.000000  |
| H7  | 1.622819  | 4.755786  | 0.000000  |
| H8  | 3.826062  | 4.045061  | 0.000000  |
| H9  | 4.062632  | 2.530833  | 0.874607  |
| H10 | 4.062632  | 2.530833  | -0.874607 |
| H11 | -1.676831 | 4.847212  | -0.874238 |
| H12 | -1.676831 | 4.847212  | 0.874238  |
| H13 | -0.457349 | 5.780888  | 0.000000  |
| F1  | -0.785856 | -4.569289 | 0.000000  |
| F2  | 3.675419  | -3.306232 | 0.000000  |
| N   | -1.717123 | -0.357568 | 0.000000  |
| O1  | 1.840966  | 1.472954  | 0.000000  |
| O2  | -0.799312 | 2.545271  | 0.000000  |

| T <sub>LC</sub> |           |           |           |
|-----------------|-----------|-----------|-----------|
| PT              | -0.000360 | 0.630690  | -0.002270 |
| C1              | -1.545480 | -1.876730 | 0.001280  |
| C2              | -2.926580 | 0.060250  | -0.005400 |
| C3              | -4.107200 | -0.737040 | -0.004510 |
| C4              | -3.964410 | -2.178960 | 0.000530  |
| C5              | -2.745120 | -2.717380 | 0.003420  |
| C6              | -0.207410 | -2.264920 | 0.001370  |
| C7              | 0.793940  | -1.202230 | -0.002720 |
| C8              | 2.122680  | -1.523230 | -0.004690 |
| C9              | 2.518520  | -2.857810 | -0.002390 |
| C10             | 1.602280  | -3.913390 | 0.002330  |
| C11             | 0.285780  | -3.612830 | 0.004090  |
| C12             | 1.970630  | 2.856600  | -0.000530 |
| C13             | 0.997730  | 3.854050  | 0.000820  |
| C14             | -0.397080 | 3.640910  | 0.000900  |
| C15             | 3.425920  | 3.257110  | 0.000330  |
| C16             | -1.313970 | 4.840730  | 0.003220  |
| H1              | -2.983040 | 1.131090  | -0.008620 |
| H2              | -5.067570 | -0.262690 | -0.007530 |
| H3              | -4.841740 | -2.797870 | 0.001690  |
| H4              | -2.614510 | -3.778090 | 0.006840  |
| H5              | 2.872690  | -0.755850 | -0.007680 |
| H6              | 1.934150  | -4.933470 | 0.004440  |
| H7              | 1.335940  | 4.870690  | 0.002480  |
| H8              | 3.567100  | 4.329640  | 0.001850  |

|             |           |           |           |
|-------------|-----------|-----------|-----------|
| H9          | 3.906890  | 2.830950  | 0.874150  |
| H10         | 3.907280  | 2.833340  | -0.874430 |
| H11         | -1.953910 | 4.793750  | -0.871490 |
| H12         | -1.953040 | 4.791000  | 0.878430  |
| H13         | -0.779280 | 5.780570  | 0.004460  |
| F1          | -0.589530 | -4.623320 | 0.008510  |
| F2          | 3.811460  | -3.158710 | -0.004150 |
| N           | -1.731420 | -0.453250 | -0.002540 |
| O1          | 1.789520  | 1.608730  | -0.001750 |
| O2          | -0.970750 | 2.536690  | -0.000420 |
| $T_{MLCTx}$ |           |           |           |
| PT          | 0.576070  | 0.075901  | -0.008177 |
| C1          | -1.951725 | 1.431952  | 0.010294  |
| C2          | -0.054285 | 2.949541  | -0.004968 |
| C3          | -0.854461 | 4.012207  | 0.017472  |
| C4          | -2.299269 | 3.829807  | 0.043617  |
| C5          | -2.803953 | 2.536543  | 0.037499  |
| C6          | -2.278600 | 0.024991  | 0.004679  |
| C7          | -1.187383 | -0.856421 | -0.001109 |
| C8          | -1.366145 | -2.244823 | -0.004105 |
| C9          | -2.638299 | -2.731109 | -0.000698 |
| C10         | -3.761609 | -1.899852 | 0.004064  |
| C11         | -3.563917 | -0.556356 | 0.006295  |
| C12         | 2.916888  | -1.782560 | 0.037755  |
| C13         | 3.869474  | -0.787583 | 0.042914  |
| C14         | 3.603363  | 0.609587  | 0.009551  |

|             |           |           |           |
|-------------|-----------|-----------|-----------|
| C15         | 3.343662  | -3.227429 | 0.068804  |
| C16         | 4.759460  | 1.577497  | 0.005836  |
| H1          | 1.012886  | 3.034685  | -0.027349 |
| H2          | -0.429934 | 4.998431  | 0.012461  |
| H3          | -2.956234 | 4.677355  | 0.066342  |
| H4          | -3.861489 | 2.373046  | 0.052442  |
| H5          | -0.530863 | -2.916398 | -0.008841 |
| H6          | -4.752538 | -2.310049 | 0.005837  |
| H7          | 4.897472  | -1.087170 | 0.070228  |
| H8          | 4.418415  | -3.345987 | 0.096917  |
| H9          | 2.907349  | -3.705516 | 0.939202  |
| H10         | 2.950683  | -3.730351 | -0.808250 |
| H11         | 4.700942  | 2.183794  | -0.891403 |
| H12         | 4.658182  | 2.242606  | 0.856121  |
| H13         | 5.721334  | 1.085669  | 0.045127  |
| F1          | -4.637232 | 0.232612  | 0.013865  |
| F2          | -2.846537 | -4.046097 | -0.005029 |
| N           | -0.535388 | 1.641723  | -0.003244 |
| O1          | 1.642008  | -1.631735 | 0.005717  |
| O2          | 2.476024  | 1.121756  | -0.022661 |
| $T_{MLCTy}$ |           |           |           |
| PT          | 0.000163  | 0.578722  | 0.000000  |
| C1          | -1.623098 | -1.791405 | 0.000000  |
| C2          | -2.952580 | 0.185825  | 0.000000  |
| C3          | -4.098861 | -0.523243 | 0.000000  |
| C4          | -4.024505 | -1.953726 | 0.000000  |

|     |           |           |           |
|-----|-----------|-----------|-----------|
| C5  | -2.814981 | -2.561074 | 0.000000  |
| C6  | -0.277526 | -2.236594 | 0.000000  |
| C7  | 0.729138  | -1.233003 | 0.000000  |
| C8  | 2.106496  | -1.557015 | 0.000000  |
| C9  | 2.473511  | -2.856191 | 0.000000  |
| C10 | 1.517824  | -3.896951 | 0.000000  |
| C11 | 0.190303  | -3.578115 | 0.000000  |
| C12 | 2.062782  | 2.750475  | 0.000000  |
| C13 | 1.113526  | 3.777115  | 0.000000  |
| C14 | -0.271054 | 3.603114  | 0.000000  |
| C15 | 3.526916  | 3.104788  | 0.000000  |
| C16 | -1.166237 | 4.814439  | 0.000000  |
| H1  | -2.948016 | 1.257484  | 0.000000  |
| H2  | -5.043684 | -0.014407 | 0.000000  |
| H3  | -4.924534 | -2.540235 | 0.000000  |
| H4  | -2.743653 | -3.628171 | 0.000000  |
| H5  | 2.848404  | -0.783135 | 0.000000  |
| H6  | 1.826593  | -4.924327 | 0.000000  |
| H7  | 1.482378  | 4.782404  | 0.000000  |
| H8  | 3.698976  | 4.171957  | 0.000000  |
| H9  | 3.992119  | 2.663437  | 0.874462  |
| H10 | 3.992119  | 2.663437  | -0.874462 |
| H11 | -1.806633 | 4.773620  | -0.874374 |
| H12 | -1.806633 | 4.773620  | 0.874374  |
| H13 | -0.615477 | 5.744682  | 0.000000  |
| F1  | -0.690188 | -4.583373 | 0.000000  |



|              |           |           |           |
|--------------|-----------|-----------|-----------|
| F2           | 3.761534  | -3.209164 | 0.000000  |
| N            | -1.727868 | -0.402035 | 0.000000  |
| O1           | 1.837438  | 1.514033  | 0.000000  |
| O2           | -0.881540 | 2.501955  | 0.000000  |
| $T_{MLCT_2}$ |           |           |           |
| PT           | 0.581248  | 0.078358  | -0.016385 |
| C1           | -1.994129 | 1.407041  | 0.010941  |
| C2           | -0.171678 | 2.964093  | -0.016504 |
| C3           | -0.997684 | 4.017087  | 0.013684  |
| C4           | -2.425306 | 3.791078  | 0.046139  |
| C5           | -2.887786 | 2.492545  | 0.044644  |
| C6           | -2.281366 | -0.004630 | 0.012104  |
| C7           | -1.173998 | -0.868353 | 0.000767  |
| C8           | -1.315649 | -2.261729 | -0.003355 |
| C9           | -2.573558 | -2.780320 | 0.006845  |
| C10          | -3.715219 | -1.972909 | 0.019443  |
| C11          | -3.551451 | -0.625832 | 0.022117  |
| C12          | 2.985070  | -1.731406 | 0.043802  |
| C13          | 3.903910  | -0.699067 | 0.076947  |
| C14          | 3.595350  | 0.683051  | 0.032563  |
| C15          | 3.471943  | -3.157957 | 0.075188  |
| C16          | 4.718445  | 1.688129  | 0.051201  |
| H1           | 0.893266  | 3.081299  | -0.042763 |
| H2           | -0.595414 | 5.012398  | 0.010234  |
| H3           | -3.109571 | 4.616827  | 0.073639  |
| H4           | -3.939521 | 2.296138  | 0.070861  |

|     |           |           |           |
|-----|-----------|-----------|-----------|
| H5  | -0.462201 | -2.910476 | -0.014072 |
| H6  | -4.696636 | -2.405336 | 0.026313  |
| H7  | 4.939970  | -0.964507 | 0.126596  |
| H8  | 4.549605  | -3.232136 | 0.127653  |
| H9  | 3.034916  | -3.660242 | 0.931319  |
| H10 | 3.119938  | -3.668661 | -0.814517 |
| H11 | 4.657127  | 2.293902  | -0.846138 |
| H12 | 4.580013  | 2.348675  | 0.899914  |
| H13 | 5.694614  | 1.227279  | 0.108246  |
| F1  | -4.645751 | 0.133496  | 0.034854  |
| F2  | -2.750465 | -4.100870 | 0.002362  |
| N   | -0.616083 | 1.664342  | -0.020481 |
| O1  | 1.714465  | -1.631012 | -0.016867 |
| O2  | 2.450921  | 1.166103  | -0.024662 |

SCT( $T_{MLCTx}/T_{LC}$ )

(Avoided crossing)

|    |           |           |           |
|----|-----------|-----------|-----------|
| PT | 0.579352  | 0.063757  | -0.067686 |
| C1 | -1.967053 | 1.460520  | -0.065335 |
| C2 | -0.124017 | 2.979732  | -0.209583 |
| C3 | -0.924021 | 4.052856  | -0.109568 |
| C4 | -2.335822 | 3.851498  | 0.048280  |
| C5 | -2.811592 | 2.561197  | 0.125842  |
| C6 | -2.272007 | 0.038556  | -0.062389 |
| C7 | -1.192755 | -0.856331 | -0.106617 |
| C8 | -1.348726 | -2.239974 | -0.031623 |
| C9 | -2.625226 | -2.713309 | 0.017641  |

|     |           |           |           |
|-----|-----------|-----------|-----------|
| C10 | -3.756831 | -1.891472 | 0.048163  |
| C11 | -3.555375 | -0.550400 | 0.050314  |
| C12 | 2.950030  | -1.806725 | 0.000360  |
| C13 | 3.900888  | -0.816812 | 0.044907  |
| C14 | 3.630397  | 0.587262  | 0.071302  |
| C15 | 3.363988  | -3.254373 | -0.009011 |
| C16 | 4.784103  | 1.555130  | 0.136143  |
| H1  | 0.940865  | 3.074830  | -0.301840 |
| H2  | -0.503867 | 5.041156  | -0.140295 |
| H3  | -3.004640 | 4.686254  | 0.149428  |
| H4  | -3.859470 | 2.386600  | 0.264610  |
| H5  | -0.512688 | -2.911328 | -0.026686 |
| H6  | -4.744833 | -2.305665 | 0.101642  |
| H7  | 4.931365  | -1.107956 | 0.058663  |
| H8  | 4.438763  | -3.378220 | 0.013516  |
| H9  | 2.929042  | -3.751783 | 0.851090  |
| H10 | 2.966450  | -3.731033 | -0.898197 |
| H11 | 4.741406  | 2.205007  | -0.731017 |
| H12 | 4.662111  | 2.177346  | 1.015684  |
| H13 | 5.745973  | 1.063590  | 0.171466  |
| F1  | -4.624172 | 0.240325  | 0.122760  |
| F2  | -2.830487 | -4.030314 | 0.052573  |
| N   | -0.590880 | 1.693104  | -0.166671 |
| O1  | 1.669403  | -1.664352 | 0.005857  |
| O2  | 2.507546  | 1.101262  | 0.026015  |

Path1

$S_{MLCTy-1}$

|     |           |           |          |
|-----|-----------|-----------|----------|
| PT  | 0.000305  | 0.581735  | 0.000000 |
| C1  | -1.653163 | -1.782773 | 0.000000 |
| C2  | -2.960257 | 0.233043  | 0.000000 |
| C3  | -4.112873 | -0.450460 | 0.000000 |
| C4  | -4.074536 | -1.897344 | 0.000000 |
| C5  | -2.847835 | -2.528334 | 0.000000 |
| C6  | -0.295765 | -2.253055 | 0.000000 |
| C7  | 0.715243  | -1.260689 | 0.000000 |
| C8  | 2.080405  | -1.590126 | 0.000000 |
| C9  | 2.423916  | -2.904574 | 0.000000 |
| C10 | 1.468509  | -3.931055 | 0.000000 |
| C11 | 0.154346  | -3.596435 | 0.000000 |
| C12 | 2.109905  | 2.713532  | 0.000000 |
| C13 | 1.191455  | 3.760081  | 0.000000 |
| C14 | -0.204195 | 3.617391  | 0.000000 |
| C15 | 3.582884  | 3.022016  | 0.000000 |
| C16 | -1.068264 | 4.850088  | 0.000000 |
| H1  | -2.944365 | 1.306078  | 0.000000 |
| H2  | -5.045852 | 0.081522  | 0.000000 |
| H3  | -4.982614 | -2.471044 | 0.000000 |
| H4  | -2.793099 | -3.596879 | 0.000000 |
| H5  | 2.842204  | -0.834790 | 0.000000 |
| H6  | 1.766923  | -4.961700 | 0.000000 |
| H7  | 1.584050  | 4.756274  | 0.000000 |

|                      |           |           |           |
|----------------------|-----------|-----------|-----------|
| H8                   | 3.786821  | 4.083612  | 0.000000  |
| H9                   | 4.034045  | 2.565487  | 0.876510  |
| H10                  | 4.034045  | 2.565487  | -0.876510 |
| H11                  | -1.708008 | 4.827139  | -0.875510 |
| H12                  | -1.708008 | 4.827139  | 0.875510  |
| H13                  | -0.492788 | 5.765286  | 0.000000  |
| F1                   | -0.736776 | -4.585187 | 0.000000  |
| F2                   | 3.708103  | -3.256873 | 0.000000  |
| N                    | -1.730381 | -0.375674 | 0.000000  |
| O1                   | 1.849487  | 1.477571  | 0.000000  |
| O2                   | -0.835212 | 2.533938  | 0.000000  |
| S <sub>MLCTy-2</sub> |           |           |           |
| PT                   | 0.573315  | 0.046707  | 0.000000  |
| C1                   | -1.868983 | 1.572574  | 0.000000  |
| C2                   | 0.081224  | 2.970590  | 0.000000  |
| C3                   | -0.655965 | 4.092401  | 0.000000  |
| C4                   | -2.092002 | 3.982481  | 0.000000  |
| C5                   | -2.673883 | 2.727027  | 0.000000  |
| C6                   | -2.282589 | 0.185007  | 0.000000  |
| C7                   | -1.225492 | -0.774507 | 0.000000  |
| C8                   | -1.469280 | -2.132047 | 0.000000  |
| C9                   | -2.779374 | -2.568748 | 0.000000  |
| C10                  | -3.839469 | -1.690335 | 0.000000  |
| C11                  | -3.576859 | -0.336647 | 0.000000  |
| C12                  | 2.796467  | -1.940232 | 0.000000  |
| C13                  | 3.790998  | -0.964757 | 0.000000  |

|                      |           |           |           |
|----------------------|-----------|-----------|-----------|
| C14                  | 3.578367  | 0.420492  | 0.000000  |
| C15                  | 3.192668  | -3.393743 | 0.000000  |
| C16                  | 4.770129  | 1.342596  | 0.000000  |
| H1                   | 1.152162  | 3.004541  | 0.000000  |
| H2                   | -0.160286 | 5.044578  | 0.000000  |
| H3                   | -2.709820 | 4.862225  | 0.000000  |
| H4                   | -3.737689 | 2.628562  | 0.000000  |
| H5                   | -0.674092 | -2.853655 | 0.000000  |
| H6                   | -4.853073 | -2.041160 | 0.000000  |
| H7                   | 4.805649  | -1.305036 | 0.000000  |
| H8                   | 4.264198  | -3.533532 | 0.000000  |
| H9                   | 2.765191  | -3.871848 | 0.874478  |
| H10                  | 2.765191  | -3.871848 | -0.874478 |
| H11                  | 4.715791  | 1.981587  | -0.874608 |
| H12                  | 4.715791  | 1.981587  | 0.874608  |
| H13                  | 5.711433  | 0.811194  | 0.000000  |
| F1                   | -4.636614 | 0.471744  | 0.000000  |
| F2                   | -3.017661 | -3.879581 | 0.000000  |
| N                    | -0.480951 | 1.726902  | 0.000000  |
| O1                   | 1.548561  | -1.753740 | 0.000000  |
| O2                   | 2.465897  | 1.001501  | 0.000000  |
| S <sub>MLCTy-3</sub> |           |           |           |
| PT                   | 0.578684  | 0.041751  | 0.000000  |
| C1                   | -1.868002 | 1.563692  | 0.000000  |
| C2                   | 0.069049  | 2.982172  | 0.000000  |
| C3                   | -0.676335 | 4.093203  | 0.000000  |

|     |           |           |           |
|-----|-----------|-----------|-----------|
| C4  | -2.121027 | 3.974977  | 0.000000  |
| C5  | -2.680314 | 2.714730  | 0.000000  |
| C6  | -2.270992 | 0.194347  | 0.000000  |
| C7  | -1.224055 | -0.772874 | 0.000000  |
| C8  | -1.474553 | -2.133880 | 0.000000  |
| C9  | -2.785636 | -2.556928 | 0.000000  |
| C10 | -3.843605 | -1.663716 | 0.000000  |
| C11 | -3.575431 | -0.322660 | 0.000000  |
| C12 | 2.812007  | -1.951808 | 0.000000  |
| C13 | 3.801947  | -0.971994 | 0.000000  |
| C14 | 3.588255  | 0.412918  | 0.000000  |
| C15 | 3.210874  | -3.403880 | 0.000000  |
| C16 | 4.777097  | 1.337285  | 0.000000  |
| H1  | 1.139560  | 3.024812  | 0.000000  |
| H2  | -0.199204 | 5.055186  | 0.000000  |
| H3  | -2.744750 | 4.849009  | 0.000000  |
| H4  | -3.745672 | 2.599001  | 0.000000  |
| H5  | -0.681253 | -2.855487 | 0.000000  |
| H6  | -4.860732 | -2.006565 | 0.000000  |
| H7  | 4.818310  | -1.308177 | 0.000000  |
| H8  | 4.282649  | -3.542713 | 0.000000  |
| H9  | 2.783821  | -3.882434 | 0.874444  |
| H10 | 2.783821  | -3.882434 | -0.874444 |
| H11 | 4.719957  | 1.976365  | -0.874313 |
| H12 | 4.719957  | 1.976365  | 0.874313  |
| H13 | 5.720082  | 0.808889  | 0.000000  |

|               |           |           |          |
|---------------|-----------|-----------|----------|
| F1            | -4.612881 | 0.513441  | 0.000000 |
| F2            | -3.051868 | -3.862409 | 0.000000 |
| N             | -0.467211 | 1.717514  | 0.000000 |
| O1            | 1.562187  | -1.768398 | 0.000000 |
| O2            | 2.474204  | 0.993592  | 0.000000 |
| $S_{MLCTy-z}$ |           |           |          |
| PT            | 0.574462  | 0.037017  | 0.000000 |
| C1            | -1.867672 | 1.564491  | 0.000000 |
| C2            | 0.076219  | 2.978905  | 0.000000 |
| C3            | -0.665130 | 4.092626  | 0.000000 |
| C4            | -2.109991 | 3.978662  | 0.000000 |
| C5            | -2.672996 | 2.722974  | 0.000000 |
| C6            | -2.274746 | 0.191170  | 0.000000 |
| C7            | -1.230657 | -0.776263 | 0.000000 |
| C8            | -1.482348 | -2.140393 | 0.000000 |
| C9            | -2.789410 | -2.562142 | 0.000000 |
| C10           | -3.851349 | -1.666976 | 0.000000 |
| C11           | -3.584264 | -0.329933 | 0.000000 |
| C12           | 2.812830  | -1.951271 | 0.000000 |
| C13           | 3.800370  | -0.968744 | 0.000000 |
| C14           | 3.584185  | 0.415366  | 0.000000 |
| C15           | 3.217159  | -3.401724 | 0.000000 |
| C16           | 4.770694  | 1.343084  | 0.000000 |
| H1            | 1.147644  | 3.014477  | 0.000000 |
| H2            | -0.187378 | 5.054156  | 0.000000 |
| H3            | -2.728233 | 4.856158  | 0.000000 |
| H4            | -3.737737 | 2.612003  | 0.000000 |



|     |           |           |           |
|-----|-----------|-----------|-----------|
| H5  | -0.686688 | -2.859308 | 0.000000  |
| H6  | -4.867038 | -2.014219 | 0.000000  |
| H7  | 4.817814  | -1.302308 | 0.000000  |
| H8  | 4.289524  | -3.536794 | 0.000000  |
| H9  | 2.791944  | -3.881836 | 0.874450  |
| H10 | 2.791944  | -3.881836 | -0.874450 |
| H11 | 4.711593  | 1.982193  | -0.874194 |
| H12 | 4.711593  | 1.982193  | 0.874194  |
| H13 | 5.715603  | 0.818121  | 0.000000  |
| F1  | -4.623254 | 0.503296  | 0.000000  |
| F2  | -3.062682 | -3.865561 | 0.000000  |
| N   | -0.464590 | 1.715248  | 0.000000  |
| O1  | 1.562515  | -1.772889 | 0.000000  |
| O2  | 2.469008  | 0.992949  | 0.000000  |

Path2

SCT→T<sub>MLCTx-1</sub>

|    |           |           |          |
|----|-----------|-----------|----------|
| PT | -0.007409 | 0.585988  | 0.000000 |
| C1 | -1.649763 | -1.773276 | 0.000000 |
| C2 | -2.948529 | 0.218836  | 0.000000 |
| C3 | -4.103213 | -0.462437 | 0.000000 |
| C4 | -4.064125 | -1.899462 | 0.000000 |
| C5 | -2.833567 | -2.526538 | 0.000000 |
| C6 | -0.286645 | -2.244098 | 0.000000 |
| C7 | 0.717685  | -1.258774 | 0.000000 |
| C8 | 2.072791  | -1.601177 | 0.000000 |
| C9 | 2.417248  | -2.918927 | 0.000000 |

|     |           |           |           |
|-----|-----------|-----------|-----------|
| C10 | 1.463603  | -3.936878 | 0.000000  |
| C11 | 0.150128  | -3.587837 | 0.000000  |
| C12 | 2.099858  | 2.721137  | 0.000000  |
| C13 | 1.190798  | 3.774244  | 0.000000  |
| C14 | -0.203818 | 3.632960  | 0.000000  |
| C15 | 3.576142  | 3.012352  | 0.000000  |
| C16 | -1.072319 | 4.862880  | 0.000000  |
| H1  | -2.940515 | 1.287724  | 0.000000  |
| H2  | -5.032121 | 0.066657  | 0.000000  |
| H3  | -4.967643 | -2.472165 | 0.000000  |
| H4  | -2.770058 | -3.593057 | 0.000000  |
| H5  | 2.842621  | -0.855159 | 0.000000  |
| H6  | 1.752617  | -4.969810 | 0.000000  |
| H7  | 1.588044  | 4.769335  | 0.000000  |
| H8  | 3.791155  | 4.072145  | 0.000000  |
| H9  | 4.026177  | 2.554628  | 0.874417  |
| H10 | 4.026177  | 2.554628  | -0.874417 |
| H11 | -1.714314 | 4.839061  | -0.874163 |
| H12 | -1.714314 | 4.839061  | 0.874163  |
| H13 | -0.500817 | 5.780899  | 0.000000  |
| F1  | -0.749838 | -4.571952 | 0.000000  |
| F2  | 3.703236  | -3.269678 | 0.000000  |
| N   | -1.720690 | -0.374647 | 0.000000  |
| O1  | 1.821801  | 1.489135  | 0.000000  |
| O2  | -0.823002 | 2.544929  | 0.000000  |

SCT → T<sub>MLCTx-2</sub>

|     |           |           |          |
|-----|-----------|-----------|----------|
| PT  | -0.006231 | 0.583754  | 0.000000 |
| C1  | -1.663123 | -1.757494 | 0.000000 |
| C2  | -2.944247 | 0.246009  | 0.000000 |
| C3  | -4.104902 | -0.425042 | 0.000000 |
| C4  | -4.078505 | -1.862356 | 0.000000 |
| C5  | -2.853532 | -2.500273 | 0.000000 |
| C6  | -0.304215 | -2.240334 | 0.000000 |
| C7  | 0.708776  | -1.263917 | 0.000000 |
| C8  | 2.060806  | -1.618272 | 0.000000 |
| C9  | 2.393614  | -2.939012 | 0.000000 |
| C10 | 1.431017  | -3.948503 | 0.000000 |
| C11 | 0.120675  | -3.587877 | 0.000000 |
| C12 | 2.119808  | 2.700212  | 0.000000 |
| C13 | 1.220082  | 3.761305  | 0.000000 |
| C14 | -0.175727 | 3.632342  | 0.000000 |
| C15 | 3.598605  | 2.978380  | 0.000000 |
| C16 | -1.033334 | 4.869883  | 0.000000 |
| H1  | -2.926795 | 1.314784  | 0.000000 |
| H2  | -5.029102 | 0.112234  | 0.000000 |
| H3  | -4.987045 | -2.427058 | 0.000000 |
| H4  | -2.799443 | -3.567311 | 0.000000 |
| H5  | 2.837193  | -0.879081 | 0.000000 |
| H6  | 1.710899  | -4.983947 | 0.000000 |
| H7  | 1.626099  | 4.752850  | 0.000000 |
| H8  | 3.822968  | 4.036233  | 0.000000 |
| H9  | 4.044581  | 2.516700  | 0.874417 |

|                          |           |           |           |
|--------------------------|-----------|-----------|-----------|
| H10                      | 4.044581  | 2.516700  | -0.874417 |
| H11                      | -1.675514 | 4.851733  | -0.874163 |
| H12                      | -1.675514 | 4.851733  | 0.874163  |
| H13                      | -0.453748 | 5.782819  | 0.000000  |
| F1                       | -0.787945 | -4.564007 | 0.000000  |
| F2                       | 3.676454  | -3.301105 | 0.000000  |
| N                        | -1.715466 | -0.354871 | 0.000000  |
| O1                       | 1.830883  | 1.470714  | 0.000000  |
| O2                       | -0.804494 | 2.549820  | 0.000000  |
| SCT→T <sub>MLCTx-3</sub> |           |           |           |
| PT                       | -0.010614 | 0.581347  | 0.000000  |
| C1                       | -1.663123 | -1.757494 | 0.000000  |
| C2                       | -2.944247 | 0.246009  | 0.000000  |
| C3                       | -4.104902 | -0.425042 | 0.000000  |
| C4                       | -4.078505 | -1.862356 | 0.000000  |
| C5                       | -2.853532 | -2.500273 | 0.000000  |
| C6                       | -0.304215 | -2.240334 | 0.000000  |
| C7                       | 0.708776  | -1.263917 | 0.000000  |
| C8                       | 2.060806  | -1.618272 | 0.000000  |
| C9                       | 2.393614  | -2.939012 | 0.000000  |
| C10                      | 1.431017  | -3.948503 | 0.000000  |
| C11                      | 0.120675  | -3.587877 | 0.000000  |
| C12                      | 2.115425  | 2.697805  | 0.000000  |
| C13                      | 1.215699  | 3.758898  | 0.000000  |
| C14                      | -0.180110 | 3.629935  | 0.000000  |
| C15                      | 3.594222  | 2.975973  | 0.000000  |

|                          |           |           |           |
|--------------------------|-----------|-----------|-----------|
| C16                      | -1.037717 | 4.867476  | 0.000000  |
| H1                       | -2.926795 | 1.314784  | 0.000000  |
| H2                       | -5.029102 | 0.112234  | 0.000000  |
| H3                       | -4.987045 | -2.427058 | 0.000000  |
| H4                       | -2.799443 | -3.567311 | 0.000000  |
| H5                       | 2.837193  | -0.879081 | 0.000000  |
| H6                       | 1.710899  | -4.983947 | 0.000000  |
| H7                       | 1.621716  | 4.750443  | 0.000000  |
| H8                       | 3.818585  | 4.033826  | 0.000000  |
| H9                       | 4.040198  | 2.514293  | 0.874417  |
| H10                      | 4.040198  | 2.514293  | -0.874417 |
| H11                      | -1.679897 | 4.849326  | -0.874163 |
| H12                      | -1.679897 | 4.849326  | 0.874163  |
| H13                      | -0.458131 | 5.780412  | 0.000000  |
| F1                       | -0.787945 | -4.564007 | 0.000000  |
| F2                       | 3.676454  | -3.301105 | 0.000000  |
| N                        | -1.711083 | -0.352464 | 0.000000  |
| O1                       | 1.826500  | 1.468307  | 0.000000  |
| O2                       | -0.808877 | 2.547413  | 0.000000  |
| SCT→T <sub>MLCTx-4</sub> |           |           |           |
| PT                       | -0.023791 | 0.575388  | 0.000000  |
| C1                       | -1.635566 | -1.796098 | 0.000000  |
| C2                       | -2.943583 | 0.253770  | 0.000000  |
| C3                       | -4.084755 | -0.429686 | 0.000000  |
| C4                       | -4.056744 | -1.886046 | 0.000000  |
| C5                       | -2.824301 | -2.525583 | 0.000000  |

|     |           |           |           |
|-----|-----------|-----------|-----------|
| C6  | -0.270926 | -2.269888 | 0.000000  |
| C7  | 0.720509  | -1.278341 | 0.000000  |
| C8  | 2.081591  | -1.603819 | 0.000000  |
| C9  | 2.430916  | -2.920656 | 0.000000  |
| C10 | 1.485513  | -3.949187 | 0.000000  |
| C11 | 0.170623  | -3.609656 | 0.000000  |
| C12 | 2.071653  | 2.710058  | 0.000000  |
| C13 | 1.175336  | 3.761351  | 0.000000  |
| C14 | -0.230747 | 3.635659  | 0.000000  |
| C15 | 3.550392  | 2.989558  | 0.000000  |
| C16 | -1.074907 | 4.885194  | 0.000000  |
| H1  | -2.912947 | 1.324058  | 0.000000  |
| H2  | -5.020431 | 0.096855  | 0.000000  |
| H3  | -4.969276 | -2.449495 | 0.000000  |
| H4  | -2.774682 | -3.594675 | 0.000000  |
| H5  | 2.838583  | -0.845117 | 0.000000  |
| H6  | 1.788406  | -4.977977 | 0.000000  |
| H7  | 1.579823  | 4.752902  | 0.000000  |
| H8  | 3.775031  | 4.046929  | 0.000000  |
| H9  | 3.993581  | 2.525250  | 0.875116  |
| H10 | 3.993581  | 2.525250  | -0.875116 |
| H11 | -1.715468 | 4.871867  | -0.874828 |
| H12 | -1.715468 | 4.871867  | 0.874828  |
| H13 | -0.485408 | 5.791488  | 0.000000  |
| F1  | -0.728304 | -4.592551 | 0.000000  |
| F2  | 3.716478  | -3.266897 | 0.000000  |

|                   |           |           |          |
|-------------------|-----------|-----------|----------|
| N                 | -1.694510 | -0.364957 | 0.000000 |
| O1                | 1.794417  | 1.466839  | 0.000000 |
| O2                | -0.863307 | 2.564672  | 0.000000 |
| Path3             |           |           |          |
| T <sub>LC-1</sub> |           |           |          |
| PT                | 0.634705  | 0.008013  | 0.000000 |
| C1                | -1.874454 | 1.563655  | 0.000000 |
| C2                | 0.063923  | 2.925977  | 0.000000 |
| C3                | -0.751655 | 4.105215  | 0.000000 |
| C4                | -2.207940 | 3.963454  | 0.000000 |
| C5                | -2.735972 | 2.744516  | 0.000000 |
| C6                | -2.276517 | 0.182862  | 0.000000 |
| C7                | -1.210554 | -0.786134 | 0.000000 |
| C8                | -1.524137 | -2.132256 | 0.000000 |
| C9                | -2.865391 | -2.524740 | 0.000000 |
| C10               | -3.899242 | -1.632041 | 0.000000 |
| C11               | -3.579831 | -0.281228 | 0.000000 |
| C12               | 2.861088  | -1.958055 | 0.000000 |
| C13               | 3.855369  | -0.976757 | 0.000000 |
| C14               | 3.639077  | 0.407097  | 0.000000 |
| C15               | 3.271620  | -3.410155 | 0.000000 |
| C16               | 4.835370  | 1.328913  | 0.000000 |
| H1                | 1.134488  | 2.957721  | 0.000000 |
| H2                | -0.282363 | 5.068518  | 0.000000 |
| H3                | -2.845037 | 4.827319  | 0.000000 |
| H4                | -3.796731 | 2.623439  | 0.000000 |

|                   |           |           |           |
|-------------------|-----------|-----------|-----------|
| H5                | -0.758157 | -2.882864 | 0.000000  |
| H6                | -4.922665 | -1.950997 | 0.000000  |
| H7                | 4.872217  | -1.313725 | 0.000000  |
| H8                | 4.344743  | -3.543329 | 0.000000  |
| H9                | 2.848913  | -3.892754 | 0.874404  |
| H10               | 2.848913  | -3.892754 | -0.874404 |
| H11               | 4.784636  | 1.968260  | -0.874943 |
| H12               | 4.784636  | 1.968260  | 0.874943  |
| H13               | 5.777524  | 0.798119  | 0.000000  |
| F1                | -4.612266 | 0.565852  | 0.000000  |
| F2                | -3.144719 | -3.821861 | 0.000000  |
| N                 | -0.460237 | 1.733646  | 0.000000  |
| O1                | 1.618956  | -1.781794 | 0.000000  |
| O2                | 2.530592  | 0.983530  | 0.000000  |
| T <sub>LC-2</sub> |           |           |           |
| PT                | 0.627327  | 0.007445  | 0.000000  |
| C1                | -1.884509 | 1.552201  | 0.000000  |
| C2                | 0.060599  | 2.922045  | 0.000000  |
| C3                | -0.744043 | 4.120755  | 0.000000  |
| C4                | -2.206553 | 3.972490  | 0.000000  |
| C5                | -2.732922 | 2.753929  | 0.000000  |
| C6                | -2.274051 | 0.180658  | 0.000000  |
| C7                | -1.211535 | -0.791200 | 0.000000  |
| C8                | -1.522421 | -2.137729 | 0.000000  |
| C9                | -2.861651 | -2.533663 | 0.000000  |
| C10               | -3.894755 | -1.640525 | 0.000000  |



|                   |           |           |           |
|-------------------|-----------|-----------|-----------|
| C11               | -3.576517 | -0.290857 | 0.000000  |
| C12               | 2.857283  | -1.958508 | 0.000000  |
| C13               | 3.850746  | -0.976486 | 0.000000  |
| C14               | 3.633028  | 0.406941  | 0.000000  |
| C15               | 3.268340  | -3.410578 | 0.000000  |
| C16               | 4.828712  | 1.329414  | 0.000000  |
| H1                | 1.131434  | 2.978111  | 0.000000  |
| H2                | -0.269168 | 5.080785  | 0.000000  |
| H3                | -2.823033 | 4.850669  | 0.000000  |
| H4                | -3.792256 | 2.613921  | 0.000000  |
| H5                | -0.754563 | -2.886377 | 0.000000  |
| H6                | -4.918036 | -1.960420 | 0.000000  |
| H7                | 4.867881  | -1.312668 | 0.000000  |
| H8                | 4.341449  | -3.543756 | 0.000000  |
| H9                | 2.845634  | -3.893280 | 0.874355  |
| H10               | 2.845634  | -3.893280 | -0.874355 |
| H11               | 4.777779  | 1.968682  | -0.874979 |
| H12               | 4.777779  | 1.968682  | 0.874979  |
| H13               | 5.771062  | 0.798943  | 0.000000  |
| F1                | -4.606556 | 0.558949  | 0.000000  |
| F2                | -3.140622 | -3.831061 | 0.000000  |
| N                 | -0.451977 | 1.738011  | 0.000000  |
| O1                | 1.615395  | -1.782161 | 0.000000  |
| O2                | 2.523989  | 0.982844  | 0.000000  |
| T <sub>LC-3</sub> |           |           |           |
| PT                | 0.629623  | 0.008395  | 0.000000  |

|     |           |           |           |
|-----|-----------|-----------|-----------|
| C1  | -1.885661 | 1.553336  | 0.000000  |
| C2  | 0.058894  | 2.926681  | 0.000000  |
| C3  | -0.749970 | 4.122736  | 0.000000  |
| C4  | -2.210095 | 3.970921  | 0.000000  |
| C5  | -2.734727 | 2.752428  | 0.000000  |
| C6  | -2.272085 | 0.180819  | 0.000000  |
| C7  | -1.209242 | -0.790107 | 0.000000  |
| C8  | -1.520476 | -2.136365 | 0.000000  |
| C9  | -2.859925 | -2.532144 | 0.000000  |
| C10 | -3.894008 | -1.639260 | 0.000000  |
| C11 | -3.575567 | -0.290458 | 0.000000  |
| C12 | 2.856393  | -1.960161 | 0.000000  |
| C13 | 3.850693  | -0.978525 | 0.000000  |
| C14 | 3.634829  | 0.405401  | 0.000000  |
| C15 | 3.267285  | -3.412230 | 0.000000  |
| C16 | 4.831643  | 1.326585  | 0.000000  |
| H1  | 1.129788  | 2.990088  | 0.000000  |
| H2  | -0.276927 | 5.083017  | 0.000000  |
| H3  | -2.829592 | 4.847298  | 0.000000  |
| H4  | -3.794174 | 2.609645  | 0.000000  |
| H5  | -0.751841 | -2.884217 | 0.000000  |
| H6  | -4.917385 | -1.958938 | 0.000000  |
| H7  | 4.867538  | -1.315629 | 0.000000  |
| H8  | 4.340427  | -3.545299 | 0.000000  |
| H9  | 2.844635  | -3.894910 | 0.874399  |
| H10 | 2.844635  | -3.894910 | -0.874399 |

|                   |           |           |           |
|-------------------|-----------|-----------|-----------|
| H11               | 4.781385  | 1.965982  | -0.874934 |
| H12               | 4.781385  | 1.965982  | 0.874934  |
| H13               | 5.773511  | 0.795251  | 0.000000  |
| F1                | -4.604928 | 0.560641  | 0.000000  |
| F2                | -3.138803 | -3.829264 | 0.000000  |
| N                 | -0.449684 | 1.740995  | 0.000000  |
| O1                | 1.614590  | -1.783666 | 0.000000  |
| O2                | 2.526737  | 0.982804  | 0.000000  |
| T <sub>LC-4</sub> |           |           |           |
| PT                | 0.629925  | 0.008371  | 0.000000  |
| C1                | -1.886825 | 1.553661  | 0.000000  |
| C2                | 0.059046  | 2.927693  | 0.000000  |
| C3                | -0.750127 | 4.122353  | 0.000000  |
| C4                | -2.208749 | 3.971118  | 0.000000  |
| C5                | -2.734092 | 2.752203  | 0.000000  |
| C6                | -2.271529 | 0.180606  | 0.000000  |
| C7                | -1.208977 | -0.789791 | 0.000000  |
| C8                | -1.520130 | -2.136503 | 0.000000  |
| C9                | -2.858984 | -2.532586 | 0.000000  |
| C10               | -3.893485 | -1.639612 | 0.000000  |
| C11               | -3.575365 | -0.291106 | 0.000000  |
| C12               | 2.855171  | -1.960139 | 0.000000  |
| C13               | 3.849104  | -0.978251 | 0.000000  |
| C14               | 3.633756  | 0.405834  | 0.000000  |
| C15               | 3.267007  | -3.412018 | 0.000000  |
| C16               | 4.831184  | 1.326232  | 0.000000  |

|     |           |           |           |
|-----|-----------|-----------|-----------|
| H1  | 1.129922  | 2.991810  | 0.000000  |
| H2  | -0.276382 | 5.082441  | 0.000000  |
| H3  | -2.829361 | 4.846758  | 0.000000  |
| H4  | -3.793644 | 2.610913  | 0.000000  |
| H5  | -0.751253 | -2.884061 | 0.000000  |
| H6  | -4.916669 | -1.959826 | 0.000000  |
| H7  | 4.865914  | -1.315430 | 0.000000  |
| H8  | 4.340206  | -3.544472 | 0.000000  |
| H9  | 2.844666  | -3.894993 | 0.874390  |
| H10 | 2.844666  | -3.894993 | -0.874390 |
| H11 | 4.781234  | 1.965641  | -0.874940 |
| H12 | 4.781234  | 1.965641  | 0.874940  |
| H13 | 5.772758  | 0.794376  | 0.000000  |
| F1  | -4.604649 | 0.560153  | 0.000000  |
| F2  | -3.137887 | -3.829629 | 0.000000  |
| N   | -0.448014 | 1.741171  | 0.000000  |
| O1  | 1.613145  | -1.784548 | 0.000000  |
| O2  | 2.526084  | 0.983904  | 0.000000  |
